# Supplementary material
Source: publisher site journal article supplement (https://www.dovepress.com/article/564913)
Supplement: Supplementary file 1 [file 564913%20Supplementary%20Table.docx]

**Supplementary Table 1** Molecular resistance mechanisms and co-mutations detected by next-generation sequencing after osimertinib progression

| Parameter | Pemetrexed (n=16) | Taxane (n=14) | Total (n=30) |
| --- | --- | --- | --- |
| EGFR-dependent resistance, n (%) |  |  |  |
| EGFR C797S* | 3 (18.8) | 2 (14.3) | 5 (16.7) |
| Bypass/alternative pathway resistance, n (%) |  |  |  |
| MET amplification | 3 (18.8) | 2 (14.3) | 5 (16.7) |
| HER2 (ERBB2) amplification | 1 (6.3) | 1 (7.1) | 2 (6.7) |
| RET fusion | 1 (6.3) | 0 (0.0) | 1 (3.3) |
| BRAF fusion / activating alteration | 0 (0.0) | 1 (7.1) | 1 (3.3) |
| KRAS mutation | 0 (0.0) | 1 (7.1) | 1 (3.3) |
| PIK3CA mutation | 1 (6.3) | 1 (7.1) | 2 (6.7) |
| Co-mutations |  |  |  |
| TP53 mutation | 9 (56.3) | 7 (50.0) | 16 (53.3) |
| RB1 mutation/loss | 2 (12.5) | 1 (7.1) | 3 (10.0) |
| TP53 + RB1 co-alteration | 1 (6.3) | 0 (0.0) | 1 (3.3) |

**Notes:** Multiple genomic alterations could co-occur in the same patient; therefore, row totals within a category may exceed 100%. *Other EGFR secondary mutations (L792X/L718X/G796X/G724S) were not detected.
